# Supplementary material
Source: PubMed Central journal article supplement (PMC3710767)
Supplement: mmc1.pdf [file mmc1.pdf]

## Supplemental Data

### Gain-of-Function Mutations in *RIT1* Cause

#### Noonan Syndrome, a RAS/MAPK Pathway Syndrome

Yoko Aoki, Tetsuya Niihori, Toshihiro Banjo, Nobuhiko Okamoto, Seiji Mizuno, Kenji Kurosawa, Tsutomu Ogata, Fumio Takada, Michihiro Yano, Toru Ando, Tadataka Hoshika, Christopher Barnett, Hirofumi Ohashi, Hiroshi Kawame, Tomonobu Hasegawa, Takahiro Okutani, Tatsuo Nagashima, Satoshi Hasegawa, Ryo Funayama, Takeshi Nagashima, Keiko Nakayama, Shin-ichi Inoue, Yusuke Watanabe, Toshihiko Ogura, and Yoichi Matsubara

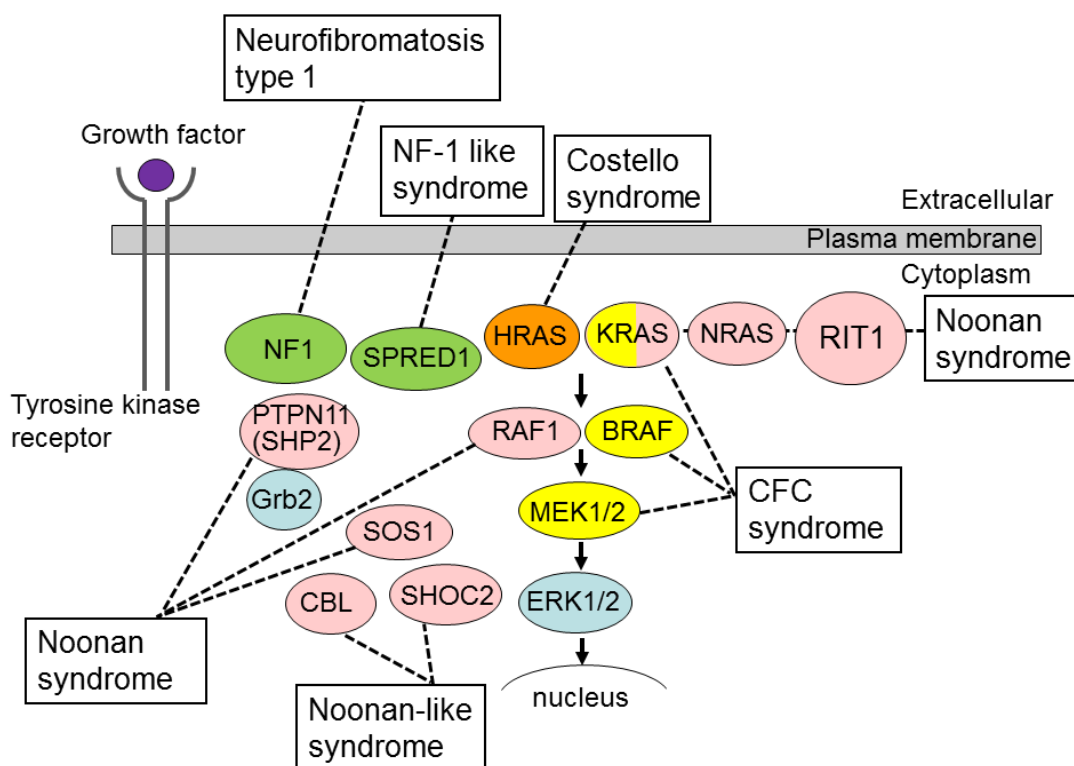

**Figure S1. RAS/ERK Pathway and Genetic Disorders (RAS/MAPK Syndromes or RASopathies)**

These disorders include: 1) Noonan syndrome caused by mutations in *PTPN11*, *SOS1*, *RAF1*, *KRAS*, and *NRAS*; 2) Noonan syndrome with multiple lentigines caused by mutations in *PTPN11* and *RAF1*; 3) Costello syndrome caused by mutations in *HRAS*; 4) cardio-facio-cutaneous (CFC) syndrome caused by mutations in *BRAF*, *MAP2K1/2* and *KRAS*. 5) Noonan syndrome-like disorder with loose anagen hair caused by mutations in *SHOC2*; 6) Noonan syndrome-like disorder caused by mutations in *CBL*; 7) Neurofibromatosis type I caused by mutations in *NF1*; 8) NF-1 like syndrome (Legius syndrome) caused by mutations in *SPRED1*. *PTPN11* encodes a protein tyrosine phosphatase SHP2. *MAP2K1* and 2 encode MEK1 and MEK2, respectively.

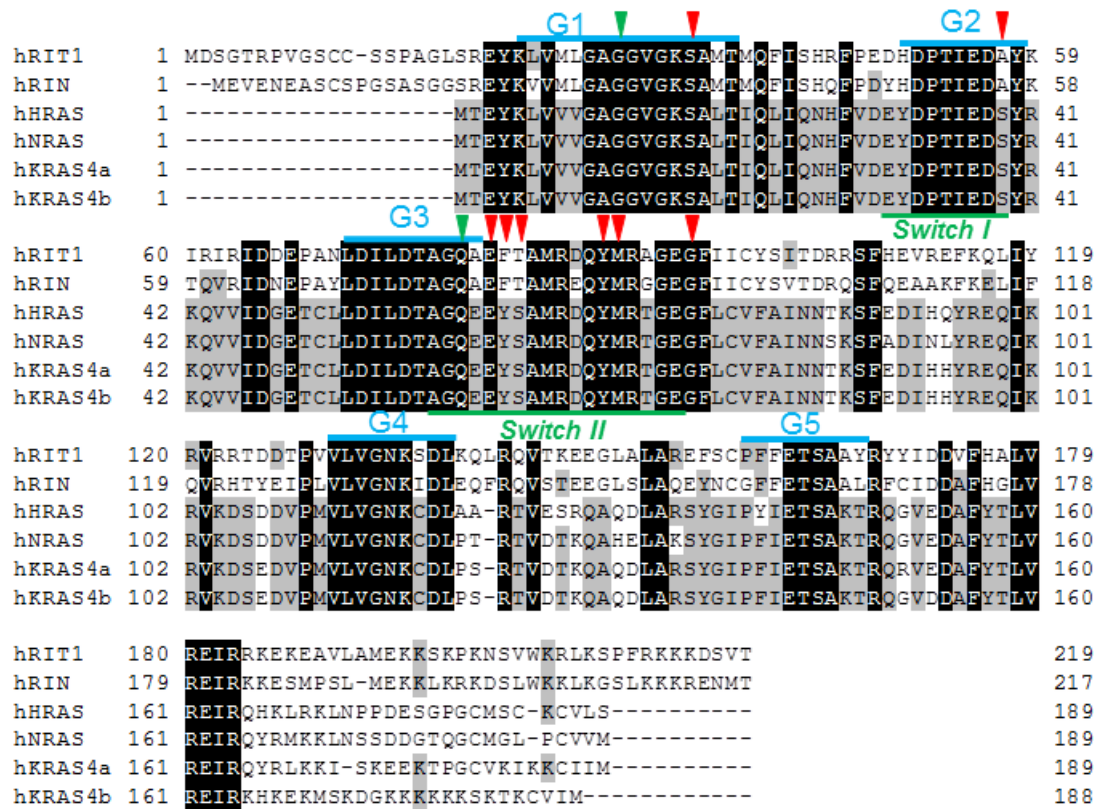

**Figure S2. Amino Acid Sequence Alignment of Human RIT1, RIT2/RIN, HRAS, NRAS, and KRAS**

The G1-G5 domains are indicated. It has been shown that domains G1 and G3 bind to phosphate, G2 to effectors and G4 and G5 to guanine. Switch I and Switch II regions corresponding to RAS are indicated. Green triangles indicate p.Gly30Val and p.Gln79Leu, which correspond to oncogenic p.Gly12Val and p.Gln61Leu mutations in RAS, respectively. Red triangles indicate amino acids where *RIT1* germline mutations were identified in this study. *RIT1* germline mutations were clustered in Switch I and Switch II regions. Past studies have shown that after GTP binding, the conformational change of RAS occurs in Switch I and Switch II regions, which causes the binding to effectors and Ras GTPase activating protein (GAP). Therefore, it is possible that missense mutations in *RIT1* might have different binding properties to effectors and/or GAP.

|           |     |                                         |                          |     |
|-----------|-----|-----------------------------------------|--------------------------|-----|
| Human     | 1   | MDSGTRPVGSCCSSPAGLSREYKLVMLGAGGVGKSA    | MTMQFISHRFPEDHDPTIEDAYKI | 60  |
| Frog      | 1   | ----MDSSVSRTPSSVAPPREYKLVMLGAGGVGKSA    | MTMQFISHRFPEDHDPTIEDAYKM | 56  |
| Zebrafish | 1   | -----MESSRSIVGHSREYKLVMLGEGGVGKSA       | ITMQFISHRFPEDHDPTIEDAYKT | 52  |
| Rat       | 1   | -----MSSISCFEAMTMQFISHRFPEDHDPTIEDAYKI  |                          | 33  |
| Mouse     | 1   | MESGARPIGSSCSSPAALSREYKLVMLGAGGVGKSA    | MTMQFISHRFPEDHDPTIEDAYKI | 60  |
| Chicken   | 1   | -----MDAGARPGGAGQPREYKLVMLGAGGVGKSA     | MTMQFISHRFPEDHDPTIEDAYKI | 54  |
| Cow       | 1   | MDSGTRPIGS-CSSPAGLSREYKLVMLGAGGVGKSA    | MTMQFISHRFPEDHDPTIEDAYKI | 59  |
| Human     | 61  | RIRIDDEPANLDILDTAGQAEFTAMRDQYMRAGEGFII  | CYSITDRRSFHEVREFKQLIYR   | 120 |
| Frog      | 57  | RIRIDDEPANLDILDTAGQAEFTAMRDQYMRAGEGFII  | CYSITDRRSFHEARDFKELIYR   | 116 |
| Zebrafish | 53  | QIRIDDEPANLDILDTAGQAEFTAMRDQYMRAGEGFII  | SYSITDRRSFQEARHFKQLIYR   | 112 |
| Rat       | 34  | RIRIDDEPANLDILDTAGQAEFTAMRDQYMRAGEGFII  | CYSITDRRSFHEVREFKQLIYR   | 93  |
| Mouse     | 61  | RIRIDDEPANLDILDTAGQAEFTAMRDQYMRAGEGFII  | CYSITDRRSFHEVREFKQLIYR   | 120 |
| Chicken   | 55  | RIRIDDEPANLDILDTAGQAEFTAMRDQYMRAGEGFII  | CYSITDRRSFHEVREFKQLIYR   | 114 |
| Cow       | 60  | RIRIDDEPANLDILDTAGQAEFTAMRDQYMRAGEGFII  | CYSITDRRSFHEVREFKQLIYR   | 119 |
| Human     | 121 | VRRIDTTPVVLVGNKSDLKQLRQVTKKEEGLALAREFS  | CPFFETSAAVRYIIDVVFHALVR  | 180 |
| Frog      | 117 | VRRIDTTPVVLVGNKSDLTRLRQVSKKEGNSLAREFNC  | PPFFETSAAFRYYIIDVVFHALVR | 176 |
| Zebrafish | 113 | VRRIDTTPVVLVGNKSDLVHLRQVSVKEEGLAREFQ    | CPFFETSAAFRYYIDEVFAALVR  | 172 |
| Rat       | 94  | VRRIDTTPVVLVGNKSDLKQLRQVSKKEEGLSLAREFNC | PPFFETSAAVRYIIDVVFHALVR  | 153 |
| Mouse     | 121 | VRRIDTTPVVLVGNKSDLKQLRQVSKKEEGLSLAREFS  | CPFFETSAAVRYIIDVVFHALVR  | 180 |
| Chicken   | 115 | VRRIDTTPVVLVGNKSDLTQLRQVSKKEGSLAREFNC   | PPFFETSAAVYR-----        | 162 |
| Cow       | 120 | VRRIDTTPVVLVGNKSDLKQLRQVTKKEEGLALAREFS  | CPFFETSAAVRYIIDVVFHALVR  | 179 |
| Human     | 181 | EIRKKEKEAVLAMEKKS                       | KPKNSVWKRKLSPFRRKKDSVT   | 219 |
| Frog      | 177 | EIRKKEKEAALANERKLRATIKRRLKSPFRRKKDSVT   |                          | 215 |
| Zebrafish | 173 | QIRQHEAEMVRDSEKTRRSHSFWSRLKAPFHRKQSEH   |                          | 211 |
| Rat       | 154 | EIRKKEKELVLAMEKKA                       | KPKNSVWKRKLSPFRRKKDSVT   | 192 |
| Mouse     | 181 | EIRKKEKELVLAMEKKA                       | KPKNSVWKRKLSPFRRKKDSVT   | 219 |
| Chicken   | 162 | -----                                   |                          | 162 |
| Cow       | 180 | EIRKKEKEAVLAMEKKS                       | KPKNSVWKRKLSPFRRKKDSVT   | 218 |

**Figure S3. Amino Acid Sequence Alignment of RIT1 among Species**

Green triangles indicate p.Gly30Val and p.Gln79Leu, which correspond to oncogenic p.Gly12Val and p.Gln79Leu mutations in RAS, respectively. Red triangles indicate amino acids where *RIT1* germline mutations were identified in this study. Serine at 35 is not conserved in rat. Because of the weakest ELK1 transactivation and familial occurrence, the further analysis will be needed to conclude that p.Ser35Thr is a pathogenic mutation.

**A** Uninjected

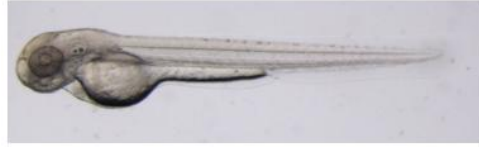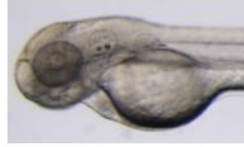

**B**

WT Rit1

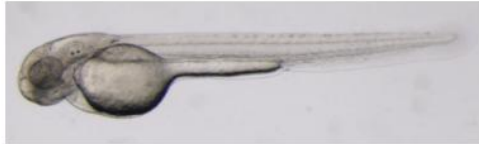

Normal

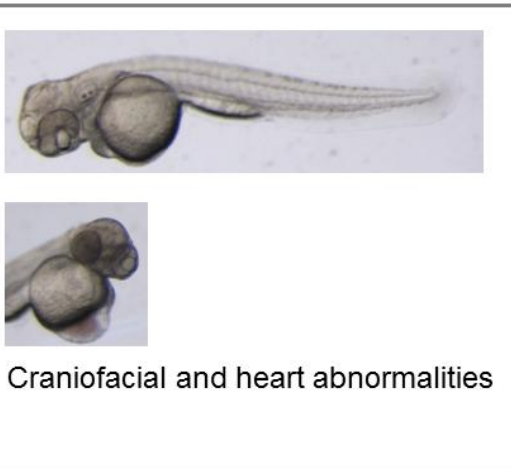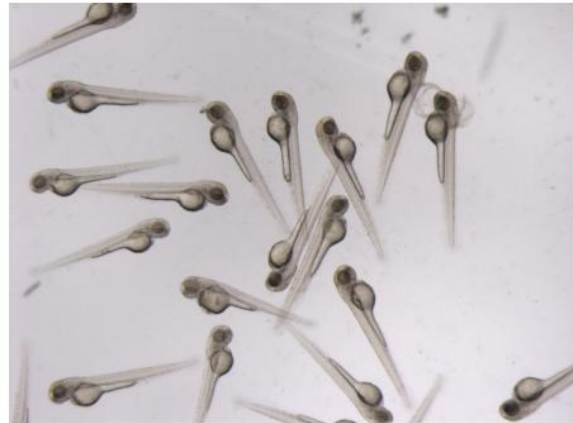

**C**

Gln79Leu Normal n=31

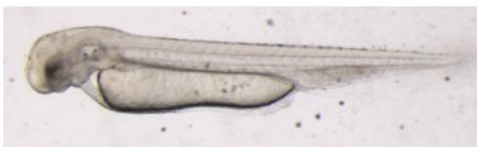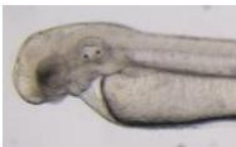

craniofacial and heart abnormalities n=78

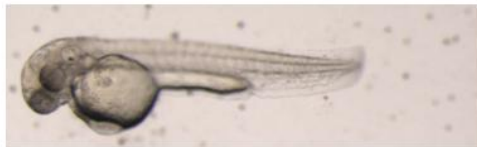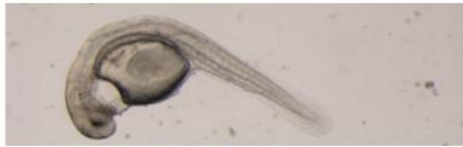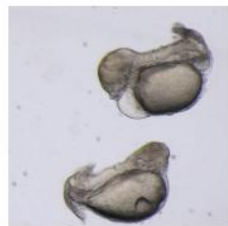

Heavily retarded n=9

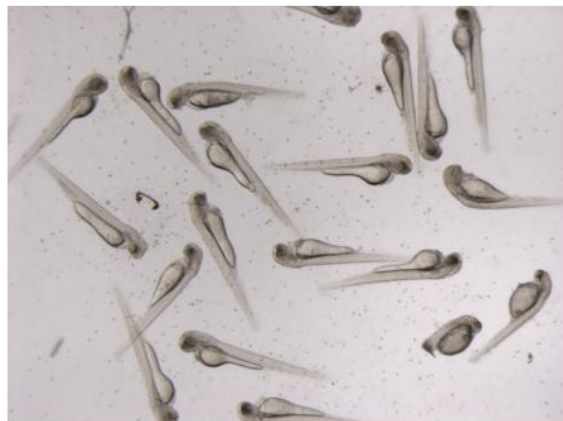

**D** Glu81Gly Normal n=42

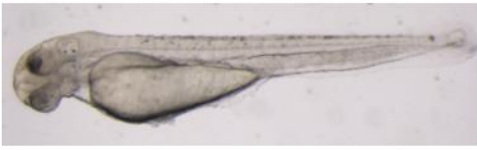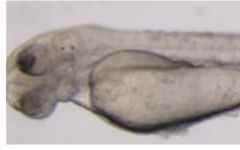

craniofacial and  
heart abnormalities  
n=55

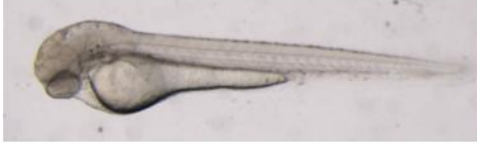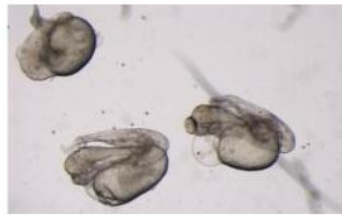

Heavily retarded  
n=8

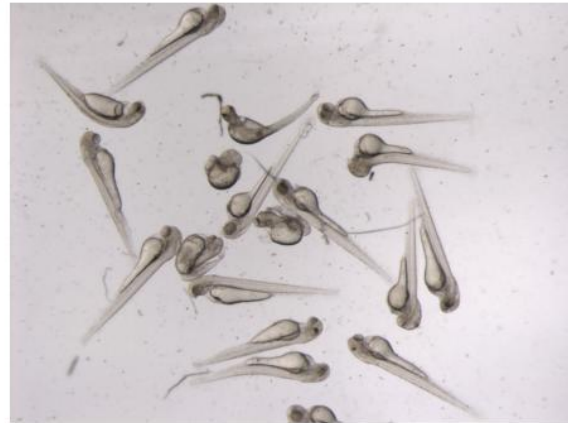

**E** Gly95Ala Normal n=44

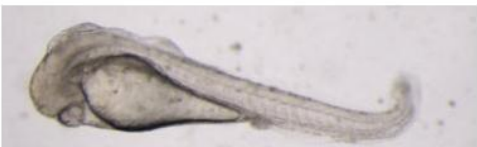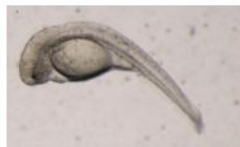

craniofacial and  
heart abnormalities  
n=34

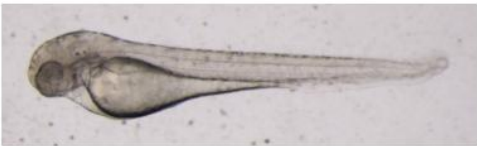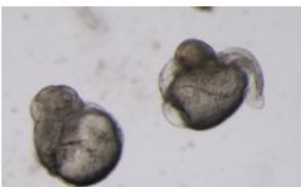

Heavily retarded  
n=6

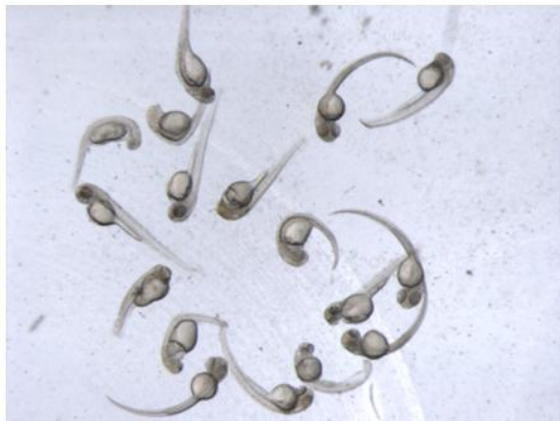



**F**

WT antisense

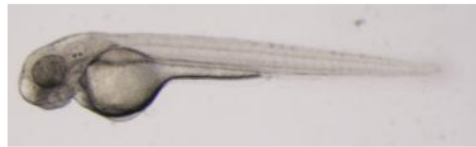

Normal

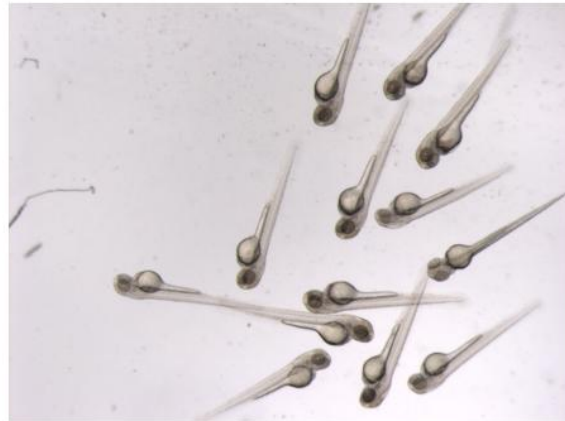

**Figure S4. Morphology of Zebrafish Embryos Injected with the Wild-Type (WT) or Mutant mRNA**

Some of the photos are also shown in Figure 3.

- (A) Uninjected embryos.
- (B) Embryos with WT RIT1.
- (C) embryos with p.Gln79Leu mutation.
- (D) embryos with p.Glu81Gly mutation.
- (E) embryos with p.Gly95Ala mutation.
- (F) embryos with antisense RNA for WT.

**Table S1. Overview of Exome-Sequencing Performance and All Variants Identified by Exome Sequencing in 14 Individuals with Noonan Syndrome and Related Disorders**

|                                                   | NS130      | NS265      | NS269      | NS358      | NS336      | NS387       | NS391      | NS392      |
|---------------------------------------------------|------------|------------|------------|------------|------------|-------------|------------|------------|
| Exome capture kit                                 | v1 (38 Mb) | v1 (38 Mb) | v1 (38Mb)  | v1 (38 Mb) | 50 Mb      | 50 Mb       | 50 Mb      | 50 Mb      |
| Mappable reads                                    | 28,612,684 | 25,018,844 | 27,325,078 | 35,460,434 | 88,959,825 | 105,207,313 | 65,204,762 | 86,100,910 |
| Nonduplicated reads                               | 272,65,370 | 23,498,618 | 25,535,471 | 34,353,775 | 66,451,916 | 73,303,640  | 55,591,364 | 71,416,629 |
| Mean (Median) depth of coverage                   | 39.65(29)  | 37.74(28)  | 40.52(30)  | 42.22(34)  | 79.88      | 92.46       | 68.83      | 88.78      |
| Total variants                                    |            |            |            |            |            |             |            |            |
| Exonic                                            | 16,645     | 16,416     | 16,726     | 16,194     | 20,128     | 20,416      | 20,228     | 20,122     |
| Nonsynonymous, nonsense, splicing site, and indel | 7,655      | 7,542      | 7,785      | 7,764      | 9,375      | 9,589       | 9,445      | 9,387      |
| Not in dbSNP135, 1000 genomes                     | 211        | 177        | 206        | 586        | 332        | 328         | 356        | 309        |
| Not in in-house exomes                            | 188        | 139        | 160        | 282        | 133        | 132         | 155        | 122        |

**Table S1. Overview of Exome-Sequencing Performance and All Variants Identified by Exome Sequencing in 14 Individuals with Noonan Syndrome and Related Disorders (*continued*)**

|                                                   | KCC7       | KCC8       | KCC15      | KCC19      | KCC38      | KCC39      |
|---------------------------------------------------|------------|------------|------------|------------|------------|------------|
| Exome capture kit                                 | 50 Mb      |
| Mappable reads                                    | 88,282,812 | 77,009,349 | 75,240,120 | 78,444,775 | 65,129,702 | 82,486,466 |
| Nonduplicated reads                               | 71,923,935 | 63,964,041 | 52,981,156 | 55,068,712 | 51,911,935 | 66,498,812 |
| Mean (Median) depth of coverage                   | 88.48      | 80.22      | 65.62      | 70.42      | 64.47      | 72.77      |
| Total variants                                    |            |            |            |            |            |            |
| Exonic                                            | 20,484     | 20,619     | 20,440     | 20,264     | 20,451     | 20,609     |
| Nonsynonymous, nonsense, splicing site, and indel | 9,676      | 9,718      | 9,586      | 9,537      | 9,570      | 9,664      |
| Not in dbSNP135, 1000 genomes                     | 387        | 390        | 383        | 408        | 377        | 382        |
| Not in in-house exomes                            | 172        | 184        | 172        | 181        | 160        | 165        |



**Table S2. Clinical Manifestations in *RIT1* Mutation-Positive Individuals**

|                                          | <b>Patient ID</b>                            |                     |                                       |                                   |                     |                              |
|------------------------------------------|----------------------------------------------|---------------------|---------------------------------------|-----------------------------------|---------------------|------------------------------|
|                                          | <b>NS414</b>                                 | <b>KCC27</b>        | <b>NS43</b>                           | <b>NS185</b>                      | <b>NS216</b>        | <b>NS402</b>                 |
| Nucleotide change                        | c.104G>C                                     | c.104G>C            | c.170C>G                              | c.170C>G                          | c.170C>G            | c.170C>G                     |
| Amino acid change                        | p.Ser35Thr                                   | p.Ser35Thr          | p.Ala57Gly                            | p.Ala57Gly                        | p.Ala57Gly          | p.Ala57Gly                   |
| Sex                                      | F                                            | F                   | M                                     | F                                 | M                   | F                            |
| Age                                      | 3y                                           | 4y                  | 8y                                    | 9y                                | 5y                  | 15y                          |
| <b>Perinatal stage</b>                   |                                              |                     |                                       |                                   |                     |                              |
| Perinatal abnormality                    | Polyhydr-<br>amnios                          | –                   | nd                                    | –                                 | Polyhydr-<br>amnios | Fetal<br>pleural<br>effusion |
| High birth weight (90<br>percentile<)    | +                                            | –                   | nd                                    | +                                 | +                   | –                            |
| <b>Craniofacial characteristics</b>      |                                              |                     |                                       |                                   |                     |                              |
| Relative macrocephaly                    | +                                            | nd                  | nd                                    | +                                 | +                   | +                            |
| Hypertelorism                            | +                                            | +                   | –                                     | +                                 | +                   | +                            |
| Downslanting palpebral<br>fissures       | +                                            | +                   | –                                     | +                                 | +                   | –                            |
| Ptosis                                   | –                                            | +                   | –                                     | +                                 | +                   | –                            |
| Epicanthal folds                         | –                                            | +                   | –                                     | +                                 | +                   | +                            |
| Low set ears                             | +                                            | –                   | –                                     | +                                 | +                   | +                            |
| <b>Skeletal characteristics</b>          |                                              |                     |                                       |                                   |                     |                              |
| Short stature (SD)                       | – (+0.5 SD)                                  | nd                  | nd                                    | –1.3 SD 9y                        | –(–1.1 SD)          | + (–3 SD)                    |
| Short neck                               | +                                            | nd                  | nd                                    | +                                 | –                   | –                            |
| Webbing of neck                          | –                                            | nd                  | +                                     | +                                 | –                   | –                            |
| Pectus abnormalities                     | +                                            | nd                  | nd                                    | –                                 | –                   | –                            |
| <b>Cardiac defects</b>                   |                                              |                     |                                       |                                   |                     |                              |
| Hypertrophic cardiomyopathy              | +                                            | +                   | +                                     | +                                 | +                   | +                            |
| Atrial septal defect                     | –                                            | –                   | –                                     | +                                 | –                   | –                            |
| Ventricular septal defect                | –                                            | –                   | –                                     | –                                 | –                   | –                            |
| Pulmonic stenosis                        | –                                            | +                   | –                                     | +                                 | –                   | +                            |
| Patent ductus arteriosus                 | –                                            | –                   | –                                     | +                                 | –                   | –                            |
| Arrhythmia                               | –                                            | –                   | –                                     | –                                 | –                   | –                            |
| Others                                   | MVP, MR<br>(moderate)                        | –                   | Mild to<br>severe MR,<br>mild TR      | –                                 | –                   | –                            |
| <b>Skin/Hair anomaly</b>                 |                                              |                     |                                       |                                   |                     |                              |
| Curly hair                               | –                                            | +                   | nd                                    | +                                 | –                   | –                            |
| Hyperelastic skin                        | –                                            | nd                  | nd                                    | +                                 | –                   | –                            |
| Eczema                                   | –                                            | nd                  | nd                                    | –                                 | –                   | +                            |
| Hyperkeratosis                           | –                                            | nd                  | nd                                    | –                                 | –                   | +                            |
| Wrinkled palms and soles                 | –                                            | nd                  | nd                                    | +                                 | +                   | –                            |
| Hyperpigmentation                        | –                                            | nd                  | nd                                    | +                                 | +                   | +                            |
| <b>Cryptorchidism</b>                    | –                                            | –                   | +                                     | –                                 | –                   | –                            |
| <b>Coagulation defects</b>               | –                                            | –                   | –                                     | +                                 | –                   | nd                           |
| <b>Growth and development</b>            |                                              |                     |                                       |                                   |                     |                              |
| Failure to thrive, feeding<br>difficulty | nd                                           | +                   | nd                                    | –                                 | +                   | nd                           |
| Intellectual disability                  | –                                            | nd                  | –                                     | (IQ=71)                           | nd                  | (IQ=74)                      |
| <b>Miscellaneous</b>                     | Hypertrophic<br>cardiomyopat<br>hy in mother | Moyamoya<br>disease | Pulmonic<br>stenosis in<br>the mother | Agenesis of<br>corpus<br>callosum | –                   | –                            |

**Table S2. Clinical Manifestations in *RIT1* Mutation-Positive Individuals (continued)**

|                                       | Patient ID                  |            |            |                                             |                                  |                                           |
|---------------------------------------|-----------------------------|------------|------------|---------------------------------------------|----------------------------------|-------------------------------------------|
|                                       | NS168                       | NS410      | NS358      | NS465                                       | NS276                            | KCC8                                      |
| Nucleotide change                     | c.242A>G                    | c.244T>G   | c.246T>G   | c.246T>G                                    | c.247A>C                         | c.265T>C                                  |
| Amino acid change                     | p.Glu81Gly                  | p.Phe82Val | p.Phe82Leu | p.Phe82Leu                                  | p.Thr83Pro                       | p.Tyr89His                                |
| Sex                                   | M                           | F          | M          | F                                           | M                                | F                                         |
| Age                                   | 12y                         | 2y         | 4y         | 22 mo                                       | 4y 7mo                           | 6y                                        |
| <b>Perinatal stage</b>                |                             |            |            |                                             |                                  |                                           |
| Perinatal abnormality                 | NT                          | -          | -          | Right chylothorax, NT at 12 weeks gestation | TTN                              | Placental abruption                       |
| High birth weight (90 percentile<)    | -                           | +          | +          | 38w, 3390g                                  | -                                | -                                         |
| <b>Craniofacial characteristics</b>   |                             |            |            |                                             |                                  |                                           |
| Relative macrocephaly                 | -                           | -          | +          | -                                           | nd                               | nd                                        |
| Hypertelorism                         | -                           | +          | +          | -                                           | +                                | +                                         |
| Downslanting palpebral fissures       | -                           | +          | +          | +                                           | +                                | +                                         |
| Ptosis                                | -                           | +          | +          | +                                           | +                                | nd                                        |
| Epicanthal folds                      | -                           | +          | +          | -                                           | +                                | nd                                        |
| Low set ears                          | -                           | +          | +          | -                                           | +                                |                                           |
| <b>Skeletal characteristics</b>       |                             |            |            |                                             |                                  |                                           |
| Short stature (SD)                    | - (-1.4 SD)                 | (+1.6 SD)  | - (-1.0SD) | 10th percentile                             | -2.1 SD at 4y 5m                 | nd                                        |
| Short neck                            | -                           | +          | -          | +                                           | +                                | nd                                        |
| Webbing of neck                       | -                           | -          | -          | -                                           | -                                | nd                                        |
| Pectus abnormalities                  | -                           | -          | -          | -                                           | -                                | nd                                        |
| <b>Cardiac defects</b>                |                             |            |            |                                             |                                  |                                           |
| Hypertrophic cardiomyopathy           | -                           | +          | -          | -                                           | +                                | +                                         |
| Atrial septal defect                  | -                           | -          | +          | -                                           | -                                | nd                                        |
| Ventricular septal defect             | +                           | -          | -          | +                                           | -                                | nd                                        |
| Pulmonic stenosis                     | +                           | -          | +          | +                                           | +                                | +                                         |
| Patent ductus arteriosus              | -                           | -          | -          | -                                           | -                                | nd                                        |
| Arrhythmia                            | -                           | -          | -          | -                                           | PVC                              | nd                                        |
| Others                                |                             |            | PH         |                                             |                                  |                                           |
| <b>Skin/Hair anomaly</b>              |                             |            |            |                                             |                                  |                                           |
| Curly hair                            | -                           | -          | -          | -                                           | -                                | +                                         |
| Hyperelastic skin                     | -                           | -          | +          | -                                           | nd                               | nd                                        |
| Eczema                                | -                           | -          | nd         | -                                           | nd                               | nd                                        |
| Hyperkeratosis                        | -                           | -          | +          | nd                                          | nd                               | nd                                        |
| Wrinkled palms and soles              | -                           | +          | +          | -                                           | nd                               | nd                                        |
| Hyperpigmentation                     | -                           | -          | +          | -                                           | nd                               | nd                                        |
| <b>Cryptorchidism</b>                 | +                           |            |            | -                                           | +                                |                                           |
| <b>Coagulation defects</b>            | -                           | nd         | nd         | -                                           | -                                | nd                                        |
| <b>Growth and development</b>         |                             |            |            |                                             |                                  |                                           |
| Failure to thrive, feeding difficulty | -                           | -          | +          | -                                           | -                                | nd                                        |
| Intellectual disability               | (IQ=79)                     | -          | -          | nd                                          | nd                               | nd                                        |
| <b>Miscellaneous</b>                  | ALL, intestinal malrotation |            |            | Mild motor delay, low muscle tone           | Hyponatremia and hyperpotassemia | Head control at 6 months, walk at 2 years |

**Table S2. Clinical Manifestations in *RIT1* Mutation-Positive Individuals (continued)**

|                                       | Patient ID                                 |                 |                              |                                          |                                                                                                    |
|---------------------------------------|--------------------------------------------|-----------------|------------------------------|------------------------------------------|----------------------------------------------------------------------------------------------------|
|                                       | KCC38                                      | NS234           | NS265                        | Og22                                     | Og45                                                                                               |
| Nucleotide change                     | c.270G>T                                   | c.284G>C        | c.284G>C                     | c.284G>C                                 | c.284G>C                                                                                           |
| Amino acid change                     | p.Met90Ile                                 | p.Gly95Ala      | p.Gly95Ala                   | p.Gly95Ala                               | p.Gly95Ala                                                                                         |
| Sex                                   | F                                          | M               | M                            | M                                        | M                                                                                                  |
| Age                                   | 3y                                         | 5y              | 8y                           | 11.1 y                                   | 0 y                                                                                                |
| <b>Perinatal stage</b>                |                                            |                 |                              |                                          |                                                                                                    |
| Perinatal abnormality                 | –                                          | Polyhydr-amnios | –                            | –                                        | Cystic hygroma in neck, polyhydramnios, pleural effusion in embryo, chylothorax in neonatal period |
| High birth weight (90 percentile<)    | –                                          | +               | –                            | –                                        | +                                                                                                  |
| <b>Craniofacial characteristics</b>   |                                            |                 |                              |                                          |                                                                                                    |
| Relative macrocephaly                 | –                                          | +               | –                            | –                                        | +                                                                                                  |
| Hypertelorism                         | +                                          | +               | +                            | +                                        | –                                                                                                  |
| Downslanting palpebral fissures       | –                                          | +               | +                            | –                                        | –                                                                                                  |
| Ptosis                                | +                                          | –               | +                            | +                                        | –                                                                                                  |
| Epicanthal folds                      | +                                          | +               | +                            | +                                        | –                                                                                                  |
| Low set ears                          | +                                          | +               | +                            | –                                        | +                                                                                                  |
| <b>Skeletal characteristics</b>       |                                            |                 |                              |                                          |                                                                                                    |
| Short stature (SD)                    | –2.2 SD at 3y 11m                          | –               | –                            | (–0.8 SD)                                | –                                                                                                  |
| Short neck                            | +                                          | +               | –                            | –                                        | +                                                                                                  |
| Webbing of neck                       | +                                          | +               | –                            | +                                        | +                                                                                                  |
| Pectus abnormalities                  | +                                          | –               | –                            | –                                        | nd                                                                                                 |
| <b>Cardiac defects</b>                |                                            |                 |                              |                                          |                                                                                                    |
| Hypertrophic cardiomyopathy           | +                                          | –               | +                            | –                                        | +                                                                                                  |
| Atrial septal defect                  | +                                          | +               | –                            | –                                        | +                                                                                                  |
| Ventricular septal defect             | +                                          | –               | –                            | –                                        | –                                                                                                  |
| Pulmonic stenosis                     | +                                          | –               | +                            | –                                        | +                                                                                                  |
| Patent ductus arteriosus              | +                                          | –               | –                            | –                                        | –                                                                                                  |
| Arrhythmia                            | –                                          | –               | –                            | –                                        | –                                                                                                  |
| Others                                | Operation for the closure of VSD, ASD, PDA |                 |                              |                                          |                                                                                                    |
| <b>Skin/Hair anomaly</b>              |                                            |                 |                              |                                          |                                                                                                    |
| Curly hair                            | +                                          | –               | –                            | nd                                       | +                                                                                                  |
| Hyperelastic skin                     | +                                          | –               | +                            | nd                                       | –                                                                                                  |
| Eczema                                | –                                          | –               | +                            | nd                                       | –                                                                                                  |
| Hyperkeratosis                        | +                                          | –               | nd                           | nd                                       | –                                                                                                  |
| Wrinkled palms and soles              | +                                          | –               | nd                           | nd                                       | –                                                                                                  |
| Hyperpigmentation                     | +                                          | +               | nd                           | –                                        | –                                                                                                  |
| <b>Cryptorchidism</b>                 |                                            | +               | +                            | Bilateral migratory testes               | +                                                                                                  |
| <b>Coagulation defects</b>            | –                                          | –               | nd                           | nd                                       | –                                                                                                  |
| <b>Growth and development</b>         |                                            |                 |                              |                                          |                                                                                                    |
| Failure to thrive, feeding difficulty | +                                          | nd              | nd                           | –                                        | +                                                                                                  |
| Intellectual disability               | DQ44 at 1y 11m                             | –               | –                            | –                                        | nd                                                                                                 |
| <b>Miscellaneous</b>                  | Hyperuricemia, hypertriglyceridemia        |                 | First word at 2 years of age | Ptosis was operated. His mother had ASD. | G-band: 46XY, hepatomegaly, hyperbilirubinemia, no abnormalities in glycosylation, died at 53 days |

MVP, mitral valve prolapse; MR, mitral regurgitation; TR, tricuspid regurgitation; NT, nuchal translucency; TTN, transient tachypnea of the newborn; VSD, ventricular septal defect; PS, pulmonic stenosis; PVC, premature ventricular contraction; IQ, intelligent quotient; ALL, acute lymphoblastic leukemia; ASD, atrial septal defect; PDA, patent ductus arteriosus; nd, no data

**Table S3. Primer Pairs Used to Amplify Exons and Their Flanking Introns in *RIT1***

| Exon | Forward                     | Reverse                     | Product Length (bp) |
|------|-----------------------------|-----------------------------|---------------------|
| 2    | 5'-F- gtgactgaactgtctaggagg | 5'-R- caciaaggtgacccacagag  | 499                 |
| 3    | 5'-F- gaccagatgggataacttgc  | 5'-R- ccaactgctgatacccttgt  | 331                 |
| 4    | 5'-F- cagtggatttagcatgcttcc | 5'-R- gcatgtcgattactgctatc  | 389                 |
| 5    | 5'-F- gtagtgggctagattgcgtc  | 5'-R- gtaagccaagccaagaatctg | 362                 |
| 6    | 5'-F- acacctccagaattgagaagc | 5'-R- caccatactcagtactgcagg | 455                 |

F: 5'- gtaaaacgacggccagt R: 5'- aggaaacagctatgacc
